# Supplementary material
Source: Springer Nature journal article supplement (https://www.springermedizin.de/resource/supplementary/12885_2013_3894_MOESM2_ESM.pdf/9464718)

EML4 Exon 20

ALK Exon 20

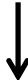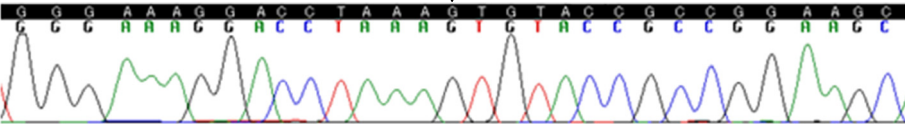

Supplement: MOESM2 [file 9464718]
